# Supplementary material for: Expression of Cellular and Extracellular TERRA, TERC and TERT in Hepatocellular Carcinoma
Source: MDPI journal article supplement (doi:10.3390/ijms23116183), 2022-05-31
Supplement: s1 [file s1]

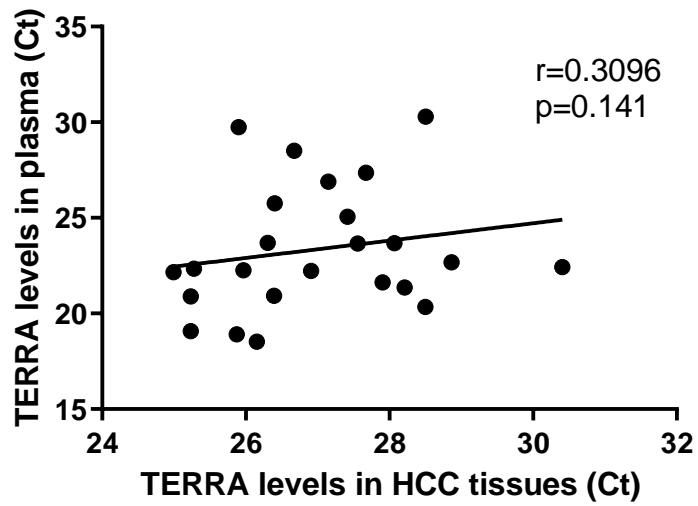

**Figure S3. Correlation between the average Ct values for TERRA levels in plasma and in HCC tissues.** Correlation was tested with Spearman's correlation analysis.
