# Supplementary material for: Expression of Cellular and Extracellular TERRA, TERC and TERT in Hepatocellular Carcinoma
Source: MDPI journal article supplement (doi:10.3390/ijms23116183), 2022-05-31
Supplement: s1 [file s1]

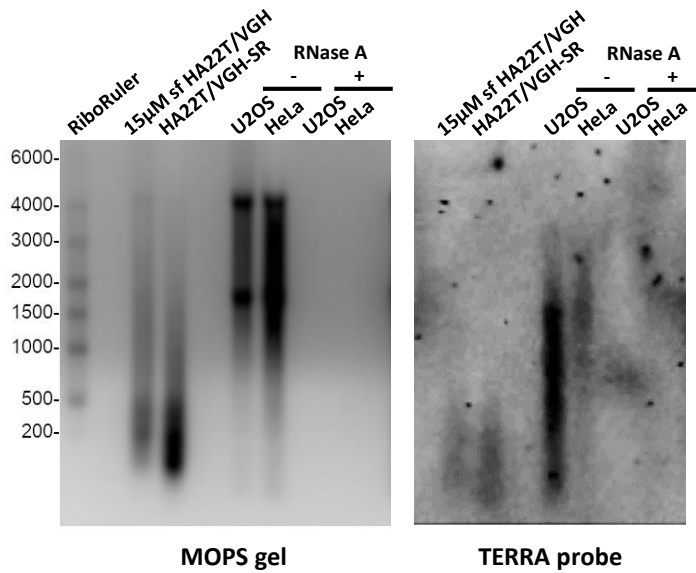

**Figure S4. Northern blot analysis of TERRA in EVs from HCC cells.** EVs samples from HCC cells contain TERRA in the size range <500 nt. For the Northern blotting, both EVs-contained RNA from HA22T/VGH cells and control total RNA samples were loaded on a gel, with control samples from HeLa and U2OS cell lines, blotted and hybridized with a TERRA-complementary probe. RNase A treatment (30 min. at 37°C) was used as a negative control. The MOPS gel was stained with Xpert Green DNA Stain.
