# Supplementary material for: Expression of Cellular and Extracellular TERRA, TERC and TERT in Hepatocellular Carcinoma
Source: MDPI journal article supplement (doi:10.3390/ijms23116183), 2022-05-31
Supplement: s1 [file s1]

**Table S1.** Association between the clinicopathological characteristics of HCC patients and the TERRA expression levels

|                              | Number of patients | Low expression<br>R < 0.7 | Equal/High expression<br>R > 0.7 | P-value |
|------------------------------|--------------------|---------------------------|----------------------------------|---------|
| <b>Gender</b>                |                    |                           |                                  |         |
| Male                         | 20                 | 12                        | 8                                | 0.620   |
| Female                       | 5                  | 4                         | 1                                |         |
| <b>Age<sup>#</sup></b>       |                    |                           |                                  |         |
| ≤ 73 years                   | 13                 | 9                         | 4                                | 0.688   |
| > 73 years                   | 12                 | 7                         | 5                                |         |
| <b>Grading</b>               |                    |                           |                                  |         |
| G1 – G2                      | 16                 | 11                        | 5                                | 0.671   |
| G2/G3-G3                     | 9                  | 5                         | 4                                |         |
| <b>Hepatitis B infection</b> |                    |                           |                                  |         |
| Positive                     | 3                  | 2                         | 1                                | 1.000   |
| Negative                     | 22                 | 14                        | 8                                |         |
| <b>Hepatitis C infection</b> |                    |                           |                                  |         |
| Positive                     | 14                 | 10                        | 4                                | 0.434   |
| Negative                     | 11                 | 6                         | 5                                |         |
| <b>Cirrhosis</b>             |                    |                           |                                  |         |
| Yes                          | 13                 | 11                        | 2                                | 0.082   |
| No                           | 11                 | 5                         | 6                                |         |

<sup>#</sup> The median value of years was used as cutoff point.

The associations between the clinicopathological characteristics of HCC patients and the expression levels of TERRA were calculated using Fisher's exact test.
