# Supplementary material for: Expression of Cellular and Extracellular TERRA, TERC and TERT in Hepatocellular Carcinoma
Source: MDPI journal article supplement (doi:10.3390/ijms23116183), 2022-05-31
Supplement: s1 [file s1]

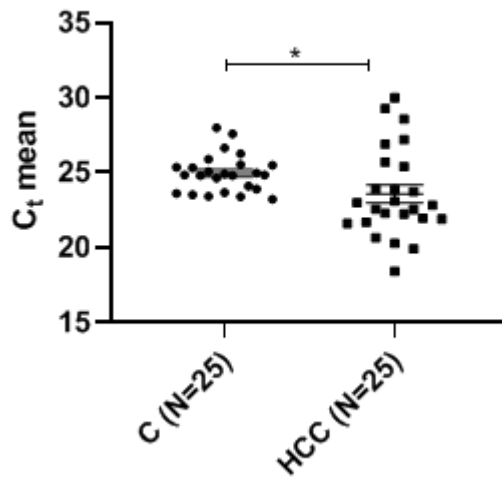

**Figure S2. Plasma levels of TERRA.** TERRA levels were reported as mean of Ct derived from the analysis of different TERRA targets (TERRA1, TERRA2, and TERRA3) in healthy (C) and HCC individuals. Unpaired t-test was used; \* $p < 0.05$ .
