# Supplementary material for: Expression of Cellular and Extracellular TERRA, TERC and TERT in Hepatocellular Carcinoma
Source: MDPI journal article supplement (doi:10.3390/ijms23116183), 2022-05-31
Supplement: s1 [file s1]

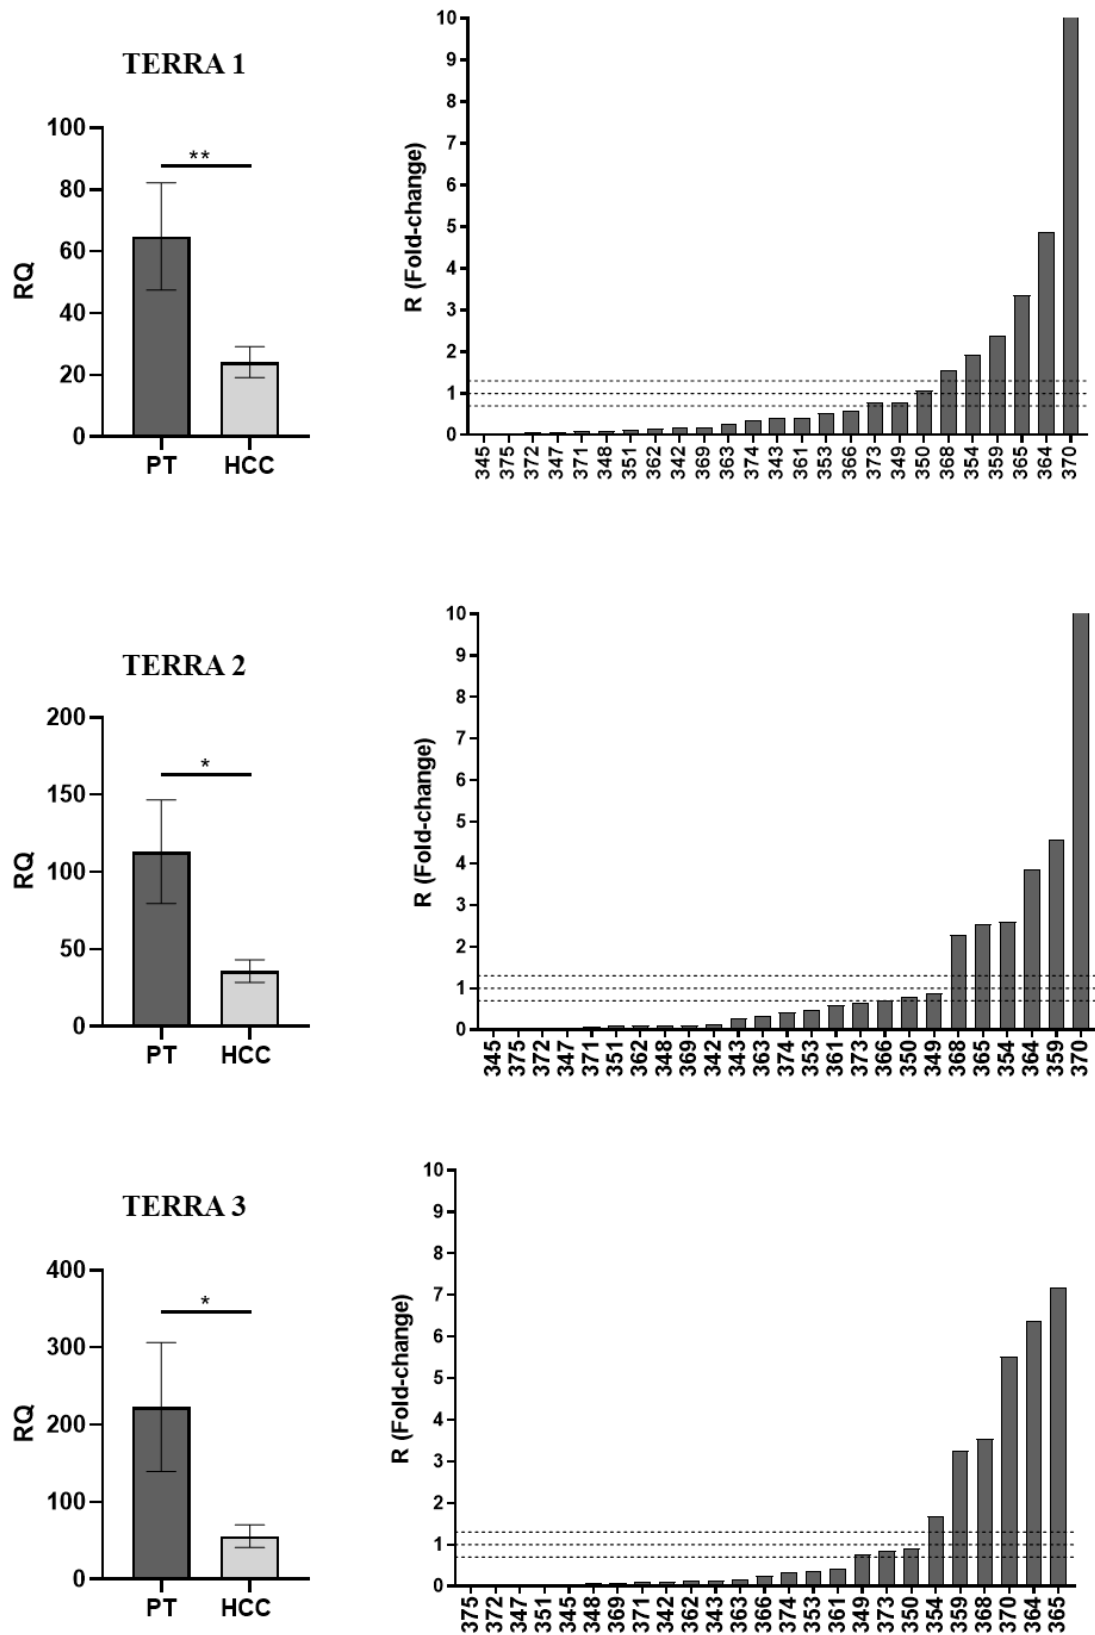

**Figure S1. Tissue expression levels of TERRA 1, TERRA 2, and TERRA 3.** On the left, relative quantification mean comparison between PT and HCC for each TERRA locus. Wilcoxon test was used; \* $p < 0.05$ , \*\* $p < 0.01$ . On the right, relative TERRA Fold-change. Histograms represent R-values. Histograms are ordered by increasing R-values. The corresponding cases are listed on x axis. Upper and lower dot lines define the range of expression variation.
