# Supplementary material for: Expression of Cellular and Extracellular TERRA, TERC and TERT in Hepatocellular Carcinoma
Source: MDPI journal article supplement (doi:10.3390/ijms23116183), 2022-05-31
Supplement: s1 [file s1]

**Table S3.** Clinical characteristics of HCC patients enrolled in the study.

| Case             | Gender | Years | Grading | Background disease                         | HBV | HCV | AFP<br>ng/ml |
|------------------|--------|-------|---------|--------------------------------------------|-----|-----|--------------|
| 342              | M      | 75    | G2-G3   | Steatosis                                  | -   | +   | 4            |
| 343              | M      | 64    | G2      | Chronic hepatitis                          | -   | +   | 1            |
| 345              | M      | 72    | G2      | Chronic hepatitis                          | -   | +   | -            |
| 347              | M      | 63    | G2      | Active cirrhosis                           | -   | -   | 8            |
| 348              | M      | 60    | G3      | Chronic hepatitis                          | +   | -   | 10           |
| 349              | M      | 71    | G2      | Hepatitis                                  | -   | -   | -            |
| 350              | M      | 78    | G3      | NA                                         | -   | +   | 3            |
| 351              | F      | 69    | G2      | Active cirrhosis                           | -   | +   | -            |
| 352 <sup>#</sup> | M      | 82    | G2      | Early cirrhosis                            | -   | +   | -            |
| 353              | M      | 82    | G2      | Normal                                     | -   | -   | 763          |
| 354              | M      | 71    | G1      | Steatosis                                  | -   | -   | -            |
| 359              | M      | 75    | G2      | Cirrhosis                                  | -   | +   | -            |
| 361              | M      | 74    | G2      | Early cirrhosis with moderate<br>steatosis | -   | +   | -            |
| 362              | F      | 79    | G2-G3   | Cirrhosis with steatosis                   | -   | +   | 13           |
| 363              | M      | 74    | G2      | Cirrhosis with steatosis                   | -   | -   | -            |
| 364              | F      | 77    | G3      | Cirrhosis with steatosis                   | -   | +   | 7            |
| 365              | M      | 76    | G3      | Von meyenburg complex                      | -   | -   | NA           |
| 366              | M      | 65    | G2-G3   | Cirrhosis with steatosis                   | +   | -   | -            |
| 368              | M      | 73    | G3      | Chronic hepatitis                          | +   | -   | 7            |
| 369              | M      | 68    | G3      | Cirrhosis with steatosis                   | -   | -   | -            |
| 370              | M      | 74    | G2      | Chronic hepatitis                          | -   | +   | -            |
| 371 <sup>*</sup> | F      | 77    | G2      | Cirrhosis with steatosis                   | -   | +   | 2            |
| 372              | M      | 73    | G2      | Early cirrhosis with moderate<br>steatosis | -   | +   | 9            |
| 373              | M      | 73    | G2      | Steatosis                                  | -   | -   | 2            |
| 374              | F      | 78    | G1      | Cirrhosis                                  | -   | +   | 1            |
| 375              | M      | 71    | G2      | Cirrhosis with steatosis                   | -   | +   | -            |

<sup>#</sup> Peripheral blood only; <sup>\*</sup> Solid biopsies only; NA, not applicable.
